# Supplementary material for: Cyclopropane-Containing Specialized Metabolites from the Marine Cyanobacterium cf. Lyngbya sp.
Source: MDPI journal article supplement (doi:10.3390/molecules28093965), 2023-05-08
Supplement: s1 [file s1]

| Table of Content                                                                                                                                                                                                                                                                                                           | Page |
|----------------------------------------------------------------------------------------------------------------------------------------------------------------------------------------------------------------------------------------------------------------------------------------------------------------------------|------|
| <b>Figure S1.</b> Incubation of VLC-derived fractions (fractions 1 to 8) at 100 µg/mL with <i>Pseudomonas aeruginosa</i> PAO1 <i>lasB-gfp</i> biosensor strain.                                                                                                                                                            | 2    |
| <b>Figure S2.</b> Mass spectra of VLC-derived fraction 3 ( <b>A</b> ) and fraction 4 ( <b>B</b> ) obtained by ESI-TOF-MS in positive ion mode, overlaid with the LC-UV chromatogram (light green lines).                                                                                                                   | 2    |
| <b>Table S1.</b> Mass spectral data and compound dereplication with the MarinLit database for compounds found in the LCMS analysis of fraction 3.                                                                                                                                                                          | 3    |
| <b>Table S2.</b> SMILE notation and InChI code for <b>2</b> .                                                                                                                                                                                                                                                              | 3    |
| <b>Figure S3.</b> UV and HR-QTOF MS spectra of <b>2</b> .                                                                                                                                                                                                                                                                  | 4    |
| <b>Figure S4.</b> <sup>1</sup> H NMR spectrum of <b>2</b> in CDCl <sub>3</sub> .                                                                                                                                                                                                                                           | 4    |
| <b>Figure S5.</b> <sup>13</sup> C NMR spectrum of <b>2</b> in CDCl <sub>3</sub> .                                                                                                                                                                                                                                          | 5    |
| <b>Figure S6.</b> DEPT spectra of <b>2</b> in CDCl <sub>3</sub> .                                                                                                                                                                                                                                                          | 6    |
| <b>Figure S7.</b> HSQC NMR spectrum of <b>2</b> in CDCl <sub>3</sub> .                                                                                                                                                                                                                                                     | 7    |
| <b>Figure S8.</b> COSY NMR spectrum of <b>2</b> in CDCl <sub>3</sub> .                                                                                                                                                                                                                                                     | 8    |
| <b>Figure S9.</b> HMBC spectrum of <b>2</b> in CDCl <sub>3</sub> .                                                                                                                                                                                                                                                         | 9    |
| <b>Figure S10.</b> NOESY spectrum of <b>2</b> in CDCl <sub>3</sub> .                                                                                                                                                                                                                                                       | 10   |
| <b>Figure S11.</b> Molecular docking of ( <b>A</b> ) natural ligand, <i>N</i> -3-oxo-dodecanoyl- <i>L</i> -homoserine lactone, ( <b>B</b> ) pitinoic acid A ( <b>8</b> ), ( <b>C</b> ) dysidazirine carboxylic acid ( <b>9</b> ) and ( <b>D</b> ) majusculoic acid onto LasR-ligand binding domain performed on Swissdock. | 11   |

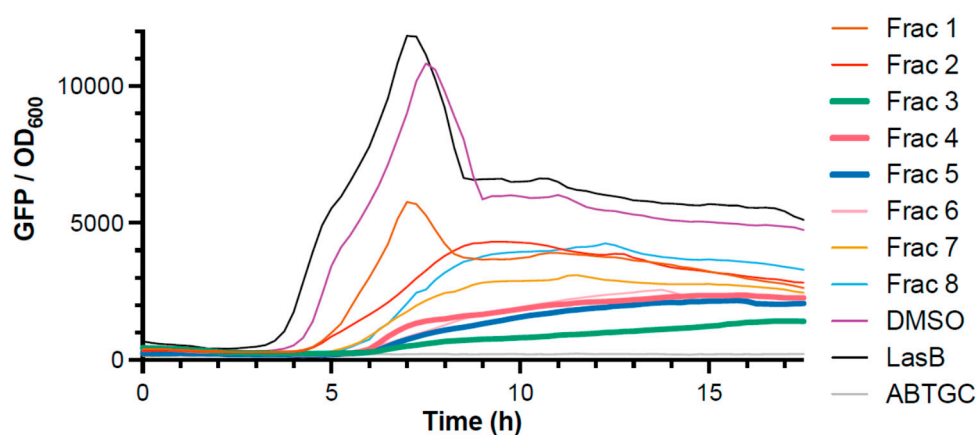

**Figure S1.** Incubation of VLC-derived fractions (fractions 1 to 8) at 100  $\mu\text{g/mL}$  with *Pseudomonas aeruginosa* PAO1 *lasB-gfp* biosensor strain. GFP/OD<sub>600</sub> values over a span of 17.5 h. DMSO, LasB, and ABTGC were used as negative, bacteria and media controls, respectively. The assay was conducted in triplicate at an effective concentration of 100  $\mu\text{g/mL}$ . A lower GFP/OD<sub>600</sub> indicates better QS inhibition. Fractions 3 to 5 demonstrated the best QS inhibition and are represented by the thicker lines.

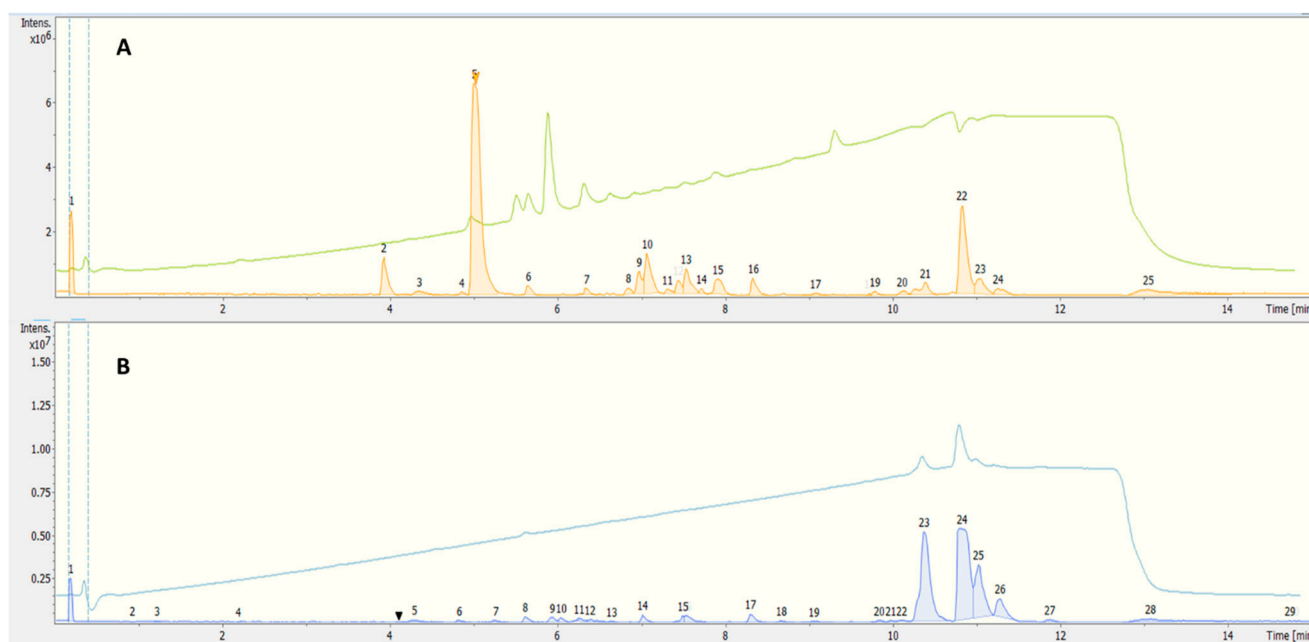

**Figure S2.** Mass spectra of VLC-derived fraction 3 (A) and fraction 4 (B) obtained by ESI-TOF-MS in positive ion mode, overlaid with the LC-UV chromatogram (light green lines).

**Table S1.** Mass spectral data and compound dereplication with the MarinLit database for metabolites found in the LCMS analysis of fractions 3 and 4.

| Fraction | RT (min) | Measured Mass [M+H] <sup>+</sup> | Predicted MF [M+H] <sup>+</sup>                               | Err (in ppm) | Database search (Marinlit and Antibase)   | Ref |
|----------|----------|----------------------------------|---------------------------------------------------------------|--------------|-------------------------------------------|-----|
| 3        | 5        | 279.0938                         | C <sub>20</sub> H <sub>11</sub> N <sub>2</sub>                | -4.4         | Pukeleimide A or B                        | [1] |
| 4        | 5.9      | 379.2435                         | C <sub>17</sub> H <sub>35</sub> N <sub>2</sub> O <sub>7</sub> | 1.1          | No hit                                    |     |
| 3        | 6.4      | 261.1457                         | C <sub>11</sub> H <sub>21</sub> N <sub>2</sub> O <sub>5</sub> | -4.9         | No hit                                    |     |
| 4        | 7.0      | 271.2247                         | C <sub>16</sub> H <sub>31</sub> O <sub>3</sub>                | 6.1          | Malyngolide                               | [2] |
| 3        | 7.1      | 347.2190                         | C <sub>17</sub> H <sub>27</sub> N <sub>6</sub> O <sub>2</sub> | -0.3         | No hit                                    |     |
| 3        | 7.4      | 349.2345                         | C <sub>17</sub> H <sub>29</sub> N <sub>6</sub> O <sub>2</sub> | 0.4          | No hit                                    |     |
| 3        | 7.7      | 429.1603                         | C <sub>21</sub> H <sub>34</sub> BrO <sub>4</sub>              | 0.8          | No hit                                    |     |
| 3        | 7.9      | 331.2240                         | C <sub>16</sub> H <sub>31</sub> N <sub>2</sub> O <sub>5</sub> | -1.6         | Phomopsidin                               | [3] |
| 3        | 9.8      | 257.2468                         | C <sub>16</sub> H <sub>33</sub> O <sub>2</sub>                | 2.0          | (-)-trans-7S-methoxytetradec-4-enoic acid | [4] |
| 3, 4     | 9.8      | 609.2685                         | C <sub>35</sub> H <sub>37</sub> N <sub>4</sub> O <sub>6</sub> | 3.7          | No hit                                    |     |
| 3, 4     | 9.8      | 637.3001                         | C <sub>37</sub> H <sub>41</sub> N <sub>4</sub> O <sub>6</sub> | 2.3          | No hit                                    |     |
| 3        | 10.3     | 537.4872                         | C <sub>32</sub> H <sub>57</sub> O <sub>6</sub>                |              | No hit                                    |     |
| 3, 4     | 10.4     | 623.2858                         | C <sub>36</sub> H <sub>39</sub> N <sub>4</sub> O <sub>6</sub> | 0.7          | Pheophorbide-like compound                | [5] |
| 3, 4     | 10.8     | 607.2916                         | C <sub>36</sub> H <sub>39</sub> N <sub>4</sub> O <sub>5</sub> | -0.1         | No hit                                    |     |
| 4        | 11.3     | 321.3128                         | C <sub>22</sub> H <sub>41</sub> O                             | 5.0          | No hit                                    |     |

- Cardellina, J.H.; Moore, R. E. The structures of pukeleimides A, B, D, E, F, and G. *Tetrahedron Lett.* **1997**, *20*, 2007–2010.
- Cardellina, J.H.; Moore, R.E.; Arnold, E.V.; Clardy, J. Structure and absolute configuration of malyngolide, an antibiotic from the marine blue-green alga *Lyngbya majuscula* Gomont. *J. Org. Chem.* **1979**, *44*, 4039–4042.
- Namikoshi, M.; Kobayashi, H.; Yoshimoto, T.; Hosoya, T. Phomopsidin, a new inhibitor of microtubule assembly produced by phomopsis sp.. isolated from coral reef in Pohnpei. *J. Antibiot.* **1997**, *50*, 890–892.
- Cardellina, J.H.; Dalietos, D.; Marner, F.-J.; Mynderse, J.S.; Moore, R.E. (-)-trans-7(s)-methoxytetradec-4-enoic acid and related amides from the marine cyanophyte *Lyngbya majuscula*. *Phytochemistry* **1978**, *17*, 2091–2095.
- Ohta, S.; Ono, F.; Shiomi, Y. et al. Anti-herpes simplex virus substances produced by the marine green alga, *Dunaliella primolecta*. *J. Appl. Phycol.* **1998**, *10*, 349–356.

**Table S2.** SMILE notation and InChI code for **2**.

|              |                                                                                                                                                                                                                                               |
|--------------|-----------------------------------------------------------------------------------------------------------------------------------------------------------------------------------------------------------------------------------------------|
| <b>SMILE</b> | CCCCCCC[C@@H]1C[C@H]1CCC(OC/C=C/C(Br)=C)=O                                                                                                                                                                                                    |
| <b>InChI</b> | 1/C18H29BrO2/c1-3-4-5-6-7-10-16-14-17(16)11-12-18(20)21-13-8-9-15(2)19/h8-9,16-17H,2-7,10-14H2,1H3/b9-8+/t16-,17-/m1/s1/i1-12,2-12,3-12,4-12,5-12,6-12,7-12,8-12,9-12,10-12,11-12,12-12,13-12,14-12,15-12,16-12,17-12,18-12,19-79,20-16,21-16 |

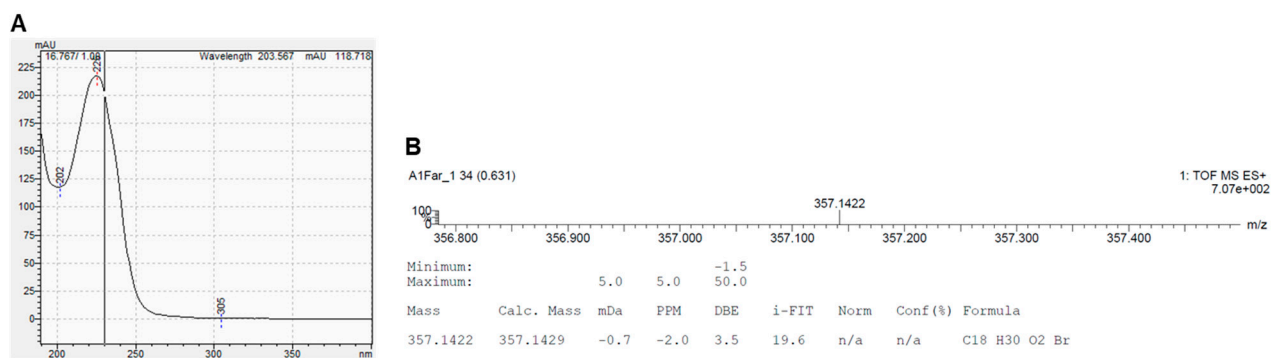

**Figure S3. (A) UV and (B) HR-QTOF MS spectra of 2.**

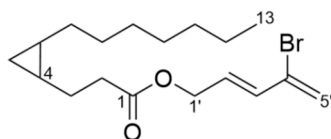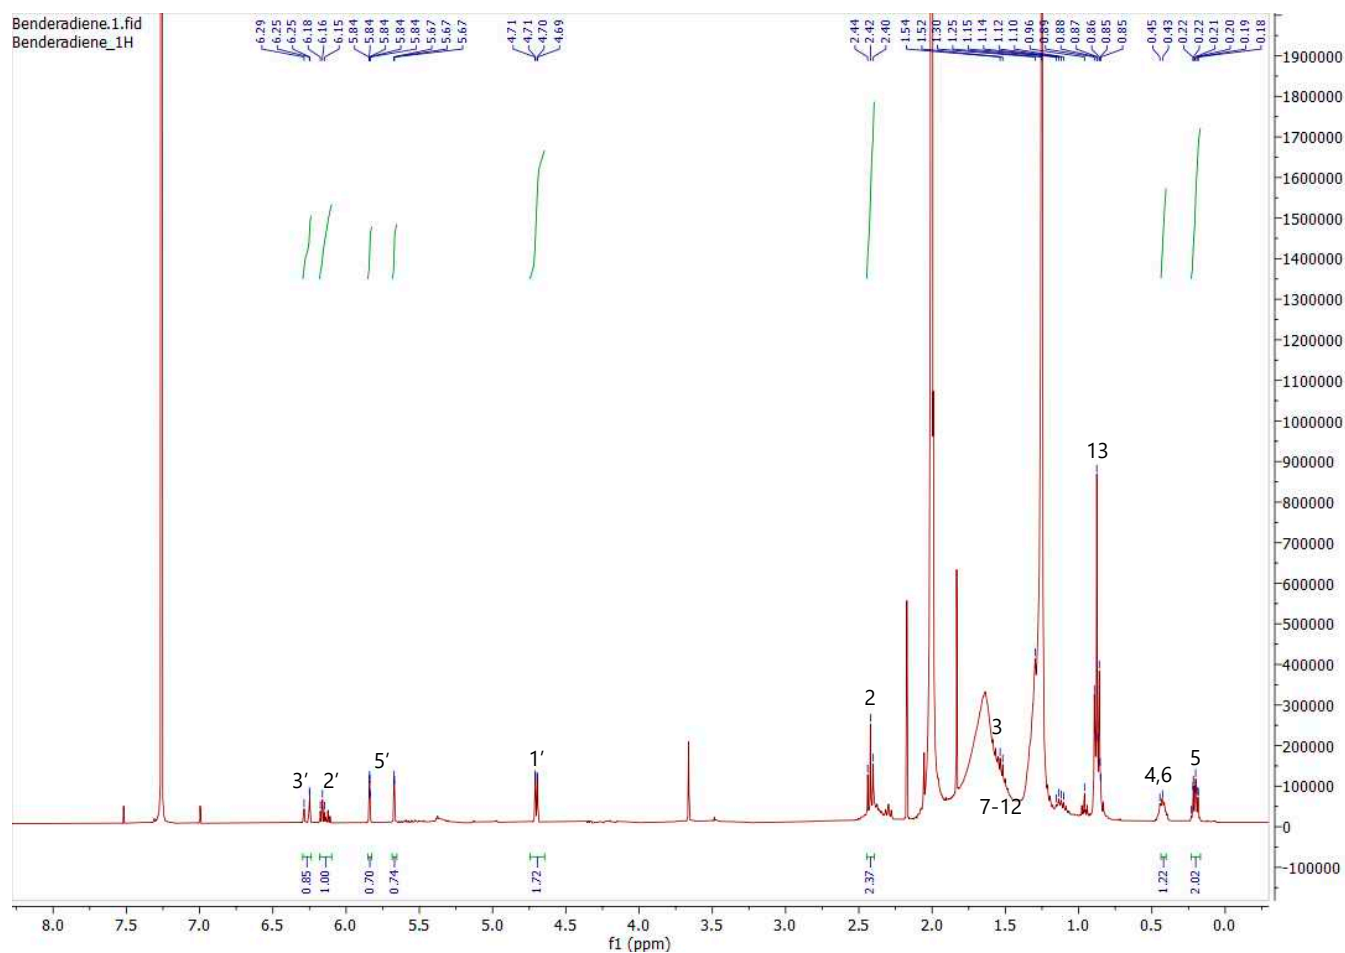

**Figure S4.  $^1\text{H}$  NMR spectrum of 2 in  $\text{CDCl}_3$ .**

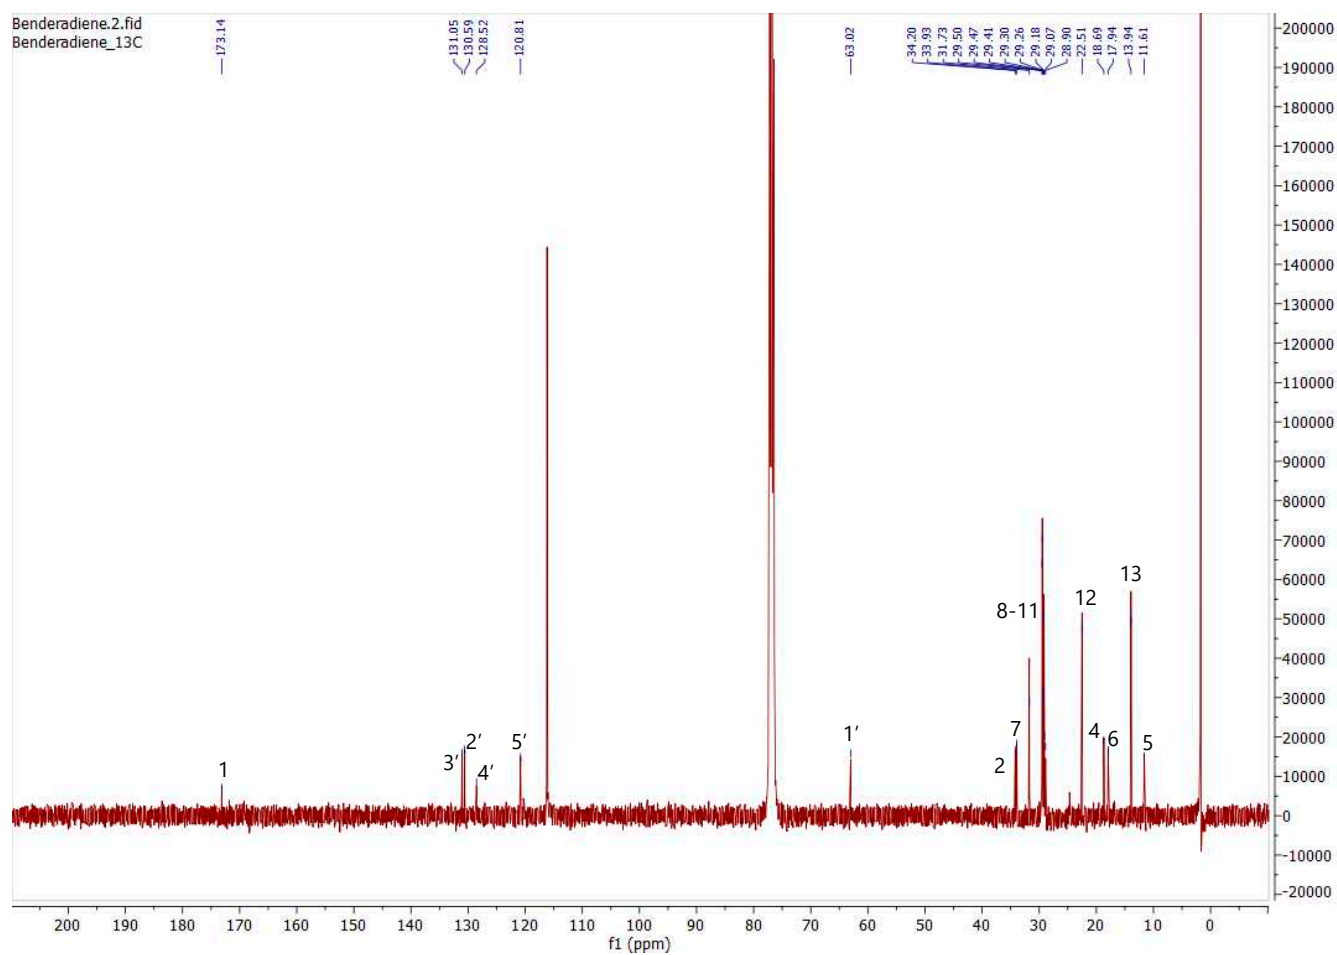

**Figure S5.**  $^{13}\text{C}$  NMR spectrum of **2** in  $\text{CDCl}_3$ .

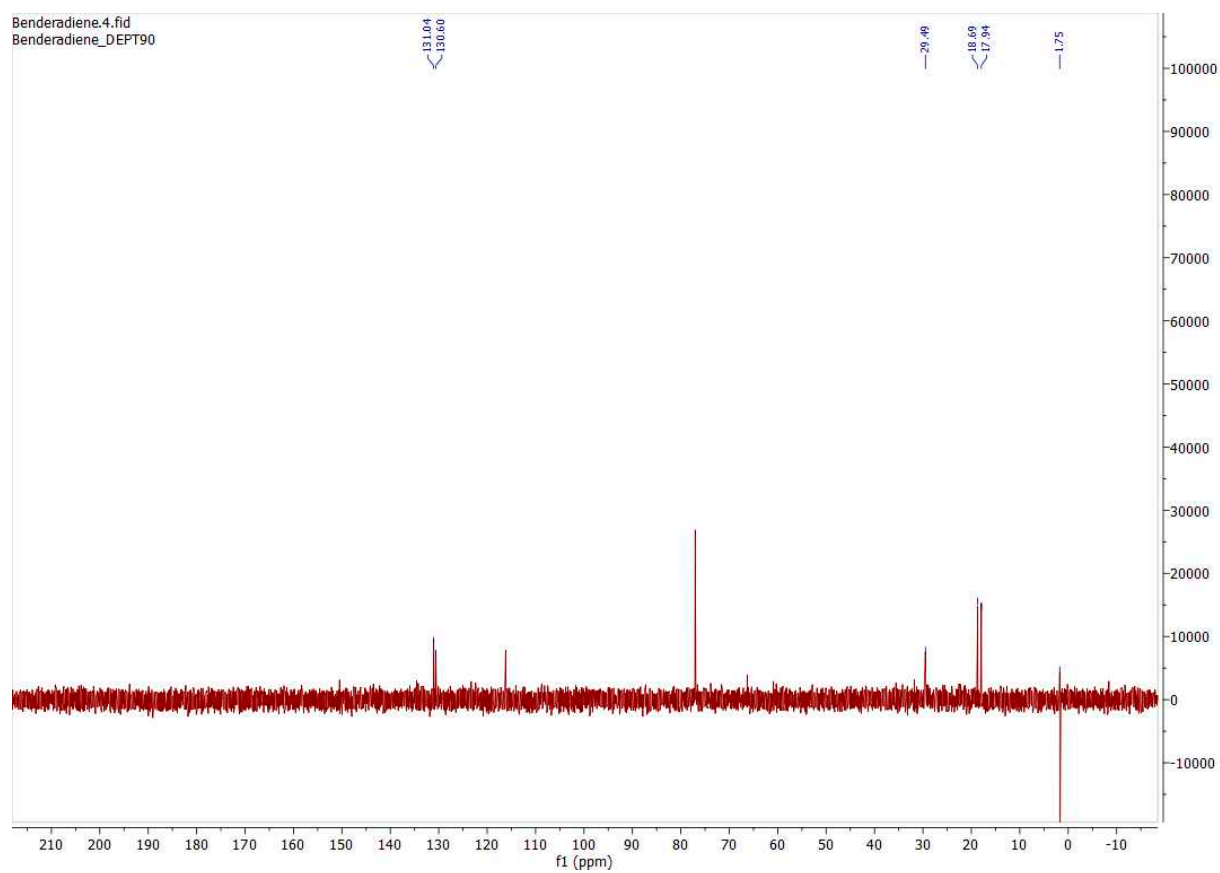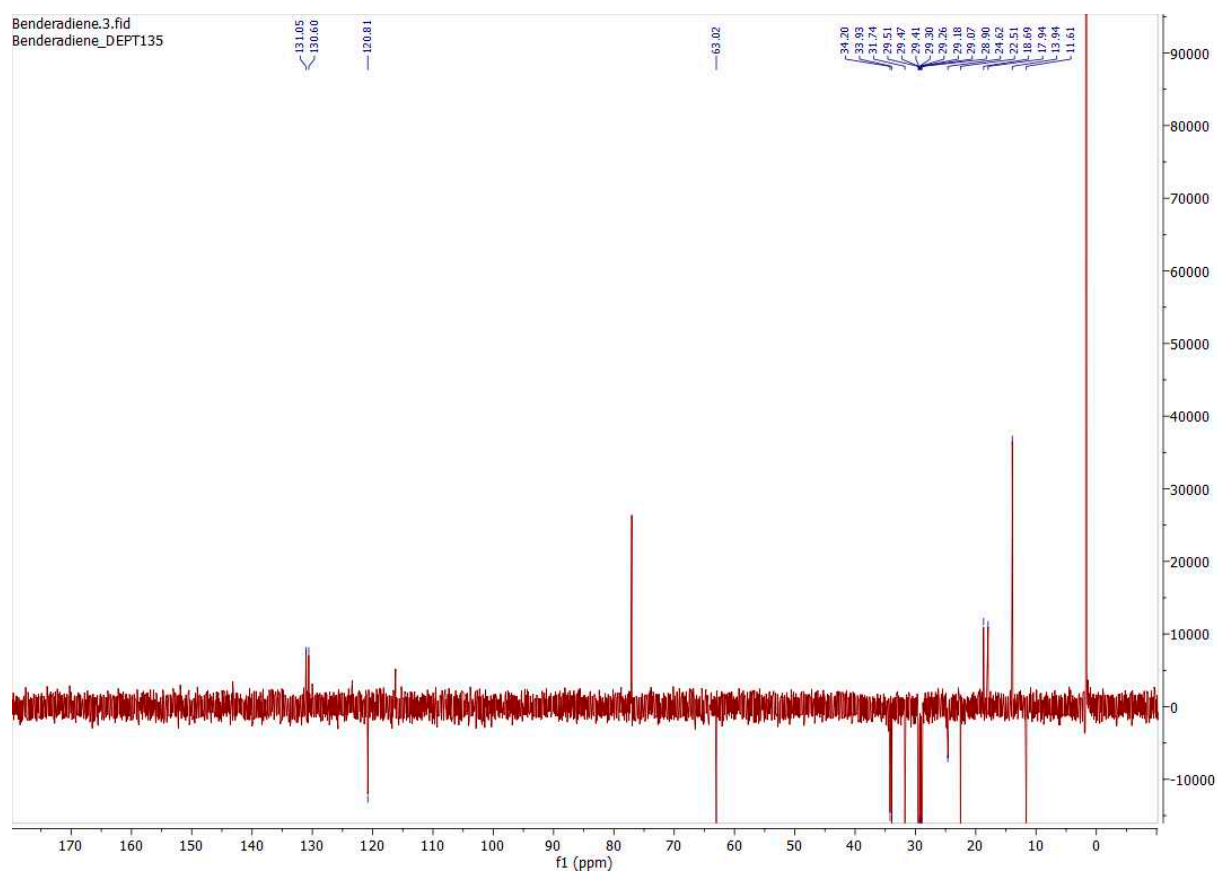

**Figure S6.** DEPT spectra of **2** in CDCl<sub>3</sub>.

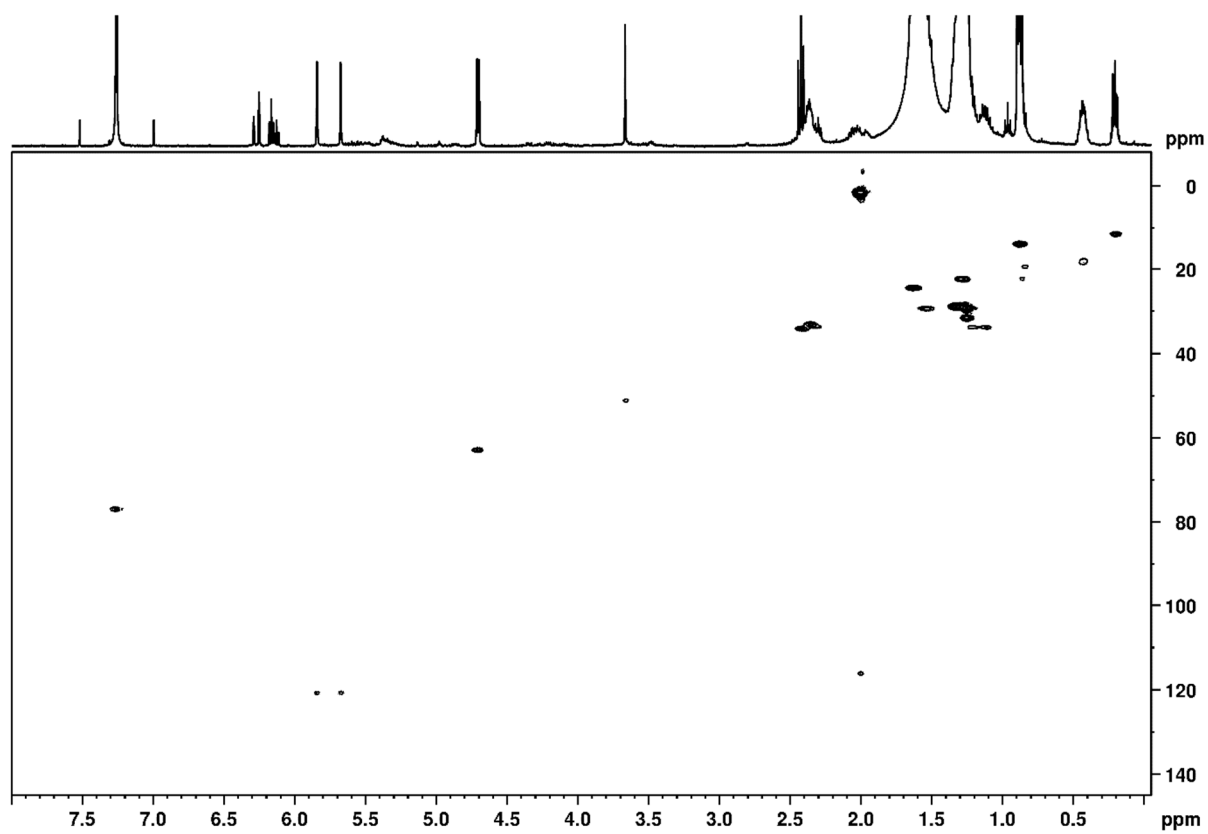

**Figure S7.** HSQC NMR spectrum of **2** in  $\text{CDCl}_3$ .

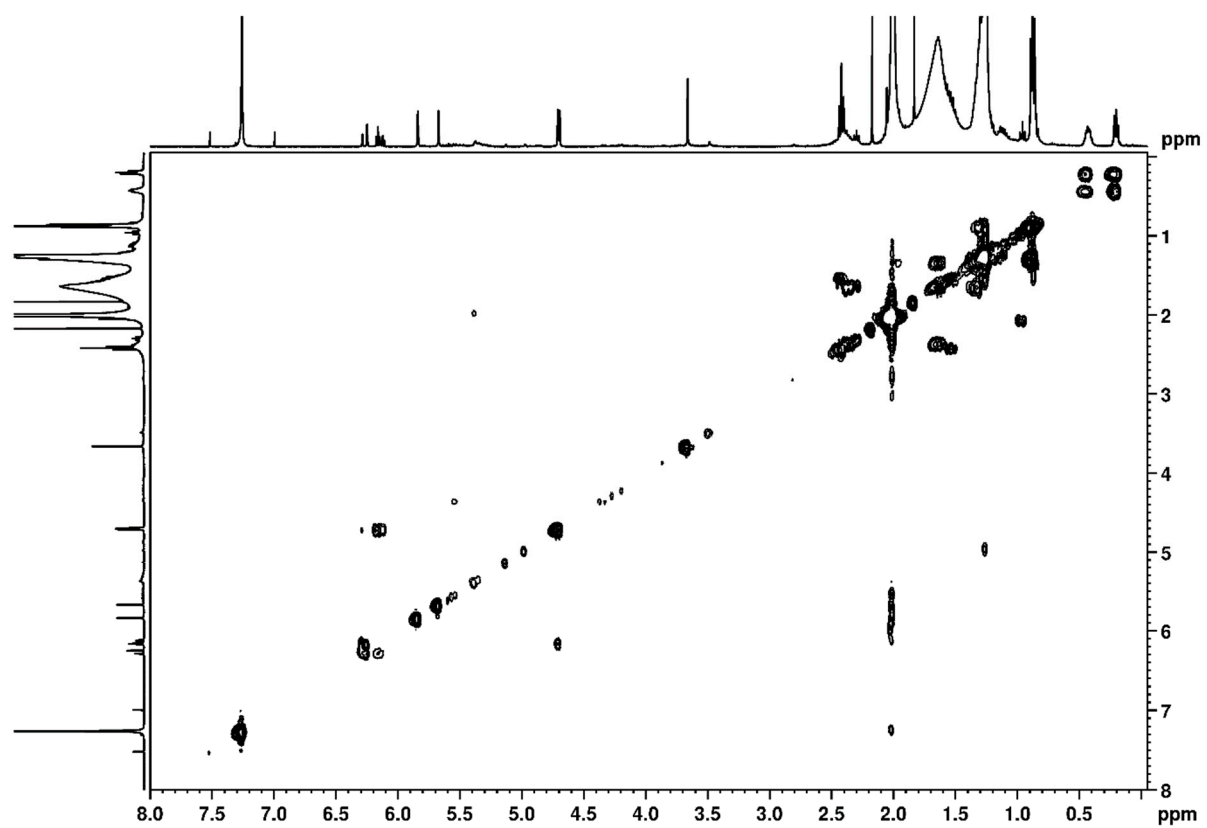

**Figure S8.** COSY NMR spectrum of **2** in  $\text{CDCl}_3$ .



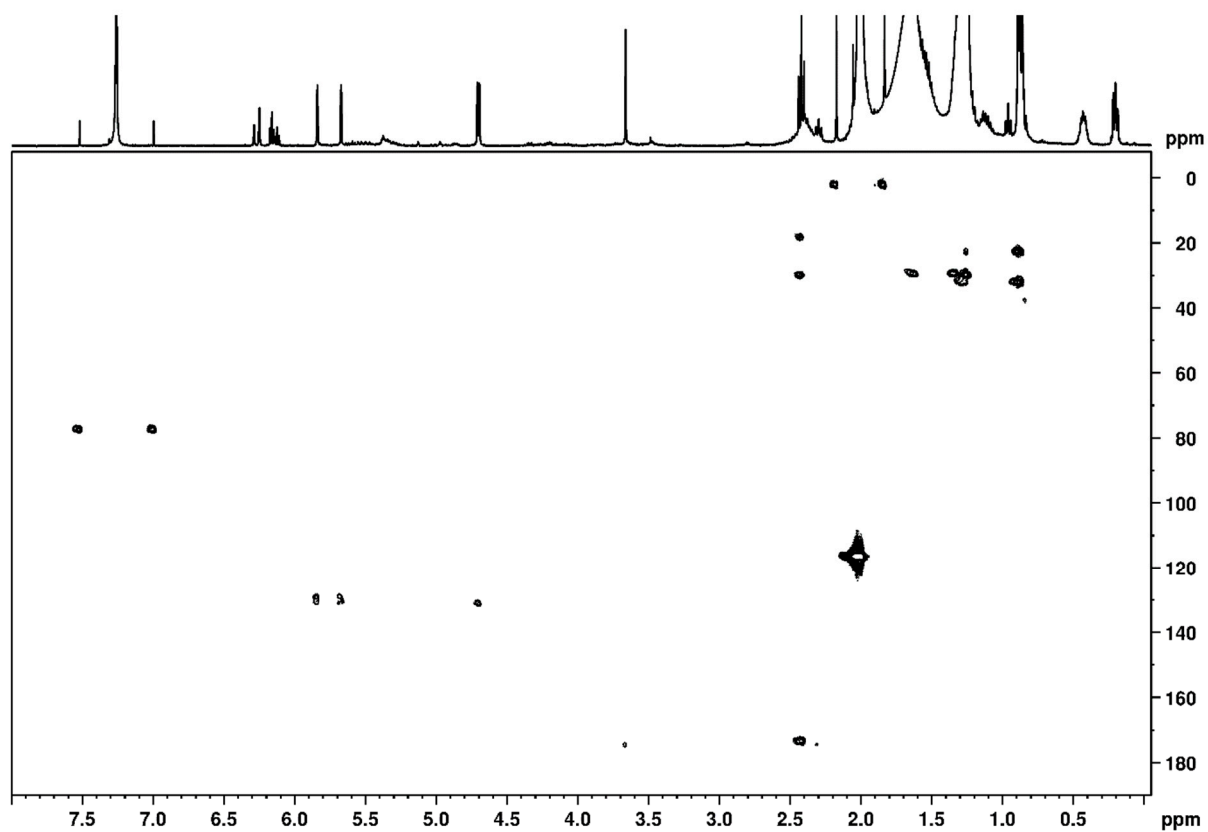

**Figure S9.** HMBC spectrum of **2** in CDCl<sub>3</sub>.

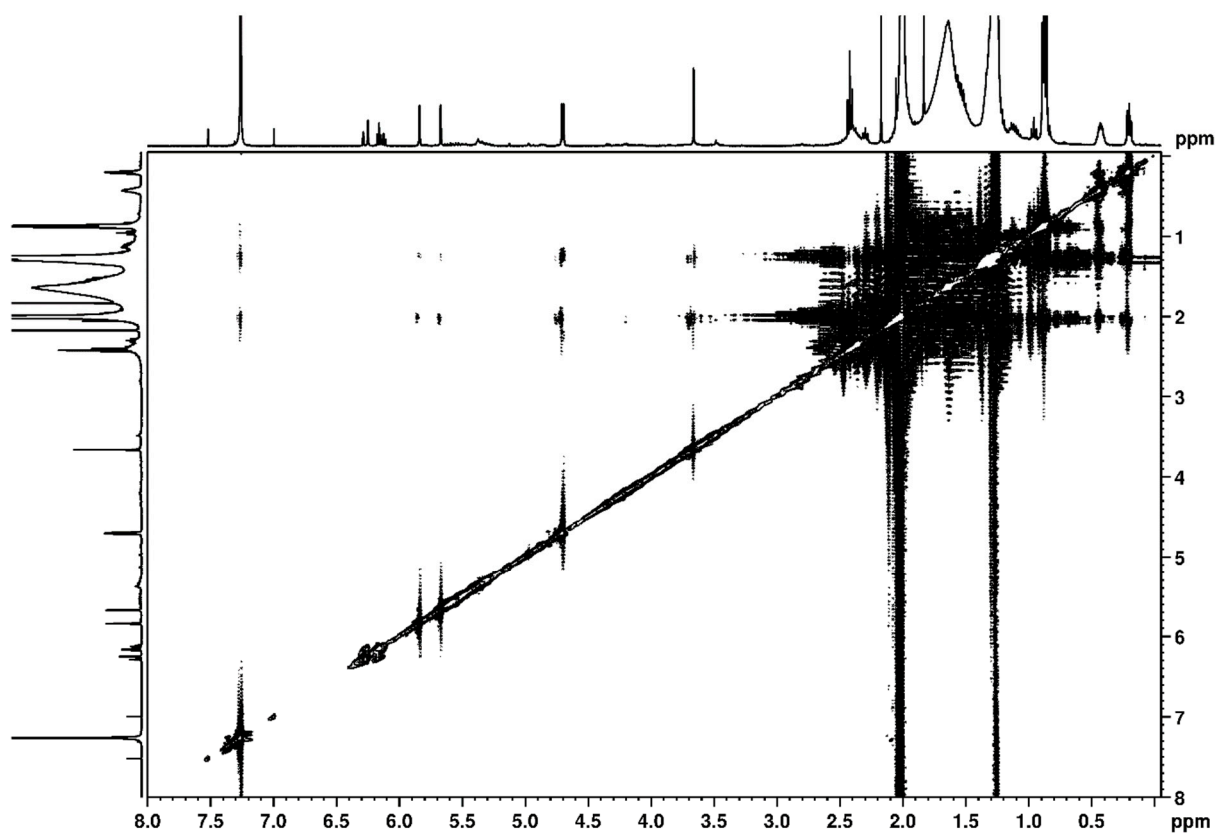

**Figure S10.** NOESY spectrum of **2** in  $\text{CDCl}_3$ .

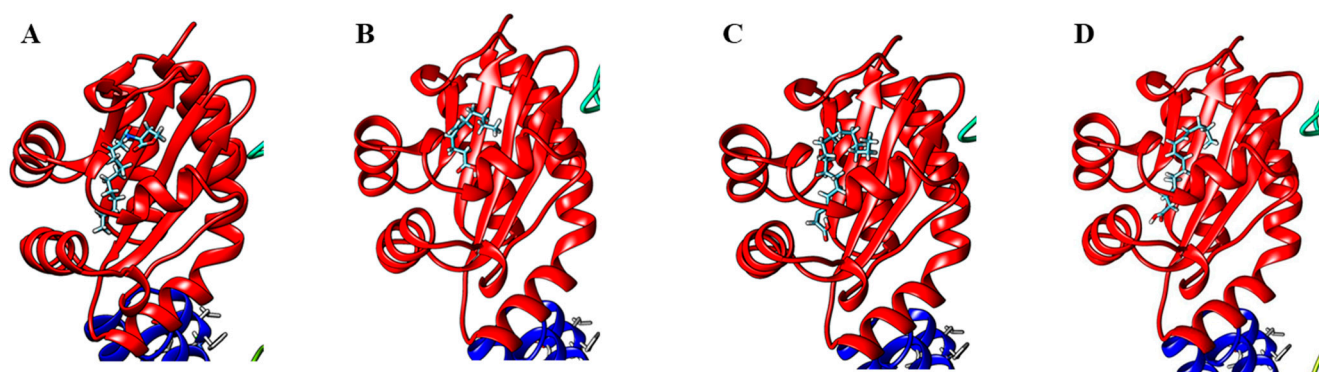

**Figure S11.** Molecular docking of (A) natural ligand, *N*-3-oxo-dodecanoyl-*L*-homoserine lactone, (B) pitinoic acid A (8), (C) dysidazirine carboxylic acid (9) and (D) majusculoic acid onto LasR-ligand binding domain performed on Swissdock.
